# Supplementary material for: A novel rhodamine-based fluorescent pH probe for high-throughput screening of high-yield polymalic acid strains from random mutant libraries
Source: Royal Society of Chemistry journal article supplement (doi:10.1039/c6ra20394a), 2016-01-01
Supplement: c6ra20394a1.pdf [file c6ra20394a1.pdf]

# **A novel rhodamine-based fluorescent pH probe for high-throughput screening of high-yield polymalic acid strains from random mutant libraries**

Hongqing Li<sup>a</sup>, Tianfu Li<sup>a</sup>, Hua Zuo<sup>a</sup>, Siyu Xiao<sup>a</sup>, Meijing Guo<sup>b</sup>, Min Jiang<sup>c</sup>, Zhenghua

Li<sup>d</sup>, Yunzheng Li<sup>d</sup>, Xiang Zou<sup>a\*</sup>

<sup>a</sup> *College of Pharmaceutical Sciences, Chongqing Engineering Research Center for Pharmaceutical Process and Quality Control, Southwest University, Chongqing 400715, P.R China*

<sup>b</sup> *State Key Laboratory of Bioreactor Engineering, East China University of Science & Technology, Shanghai 200237, P.R China*

<sup>c</sup> *State Key Laboratory of Materials-Oriented Chemical Engineering, College of Biotechnology and Pharmaceutical Engineering, Nanjing Tech University, Nanjing 211816, P.R China*

<sup>d</sup> *Anhui Engineering Research for Malic Acid Technology, Anhui Sealong Biotechnology Co., Ltd, Bengbu, 233316, P.R China*

\*Corresponding author: [zhx1030@swu.edu.cn](mailto:zhx1030@swu.edu.cn); Fax: (+86-23) 6825-1225

Table S1. Characteristics of the mutants and wild type strain fermentation in shake-flask.

| Strains           | DCW(g/L)   | Residual<br>sugar (g/L) | PMA (g/L)  | Productivity<br>(g/L h) | Yield<br>(g/g) |
|-------------------|------------|-------------------------|------------|-------------------------|----------------|
| CCTCCM20<br>12223 | 18.99±0.81 | 1.13±0.12               | 21.01±0.92 | 0.22                    | 0.24           |
| BH-5              | 19.28±1.18 | 1.23±0.16               | 21.96±1.12 | 0.23                    | 0.25           |
| YH-6              | 19.38±1.28 | 1.31±0.20               | 20.64±0.96 | 0.22                    | 0.23           |
| YH-41             | 20.28±0.37 | 1.31±0.09               | 21.17±2.22 | 0.22                    | 0.24           |
| AH-1              | 18.62±0.68 | 1.21±0.18               | 22.90±0.81 | 0.24                    | 0.26           |
| BH-41             | 19.87±0.78 | 1.37±0.15               | 21.86±1.15 | 0.23                    | 0.25           |
| BH-31             | 21.41±0.77 | 1.34±0.13               | 23.12±0.68 | 0.24                    | 0.26           |
| AH-16             | 20.50±0.51 | 1.24±0.21               | 22.89±0.36 | 0.24                    | 0.26           |
| AH-21             | 21.37±0.73 | 1.25±0.24               | 24.21±0.47 | 0.25                    | 0.27           |
